# Supplementary material for: Evolution and spread of Venezuelan equine encephalitis complex alphavirus in the Americas
Source: PubMed Central journal article supplement (PMC5557581; doi:10.1371/journal.pntd.0005693), 2017-08-03
Supplement: pntd.0005693.s001.pdf [file pntd.0005693.s001.pdf]

Supplementary Table 1. Metadata associated with the strains involved in this study. Embolded strains were sequenced for this study

| Accession Numb | Virus Strain | Subtype | Country   | District                             | Collection Date | Host                    | Passage History     |
|----------------|--------------|---------|-----------|--------------------------------------|-----------------|-------------------------|---------------------|
| KC344505       | 69Z1         | IAB     | Guatemala |                                      | 1969            | Human                   | sm2, BHK1           |
| KC344483       | 111/73       | IAB     | Peru      |                                      | 1973            | Horse                   | sm3                 |
| KC344485       | CoAn5384     | IAB     | Colombia  | Cali                                 | 1967            | Horse                   | sm2,cec1            |
| KC344430       | Hoja Redonda | IAB     | Peru      | Hoja Redonda                         | 1/6/71          |                         | CE 1                |
| KC344516       | Beck-Wycoff  | IAB     | Venezuela | Aragua St                            | 1938            | Horse                   |                     |
| KR260376*      | CoAn5506     | IAB     | Colombia  | Valle del Cauca                      | 20-May-05       | Horse                   | sm1, V1             |
| KU059753*      | Piura        | IAB     | Peru      | Piura                                | 1942            | Mule                    | sm3, V1             |
| KU059754*      | E1/68        | IAB     | Venezuela | Guarija                              | 27-Oct-68       | Human                   | Sm1, CEC1, V2       |
| KU059755*      | E123/69      | IAB     | Venezuela | Mara                                 | 20-Oct-69       | Human                   | sm1, CEC1, V2       |
| KU059756*      | 52/73        | IAB     | Peru      | Loreto, La Libertad                  | 1973            | Donkey                  | sm2, V2             |
| KU059757*      | E541/73      | IAB     | Venezuela | Guarija                              | 26-Oct-73       | Human                   | V?                  |
| KC344528       | PHO127       | IC      | Venezuela | Zulia St.                            | 1962            | Human                   | v2                  |
| KC344484       | V178         | IC      | Colombia  | Cuninamarca                          | 1961            | Horse                   | sm1,V1              |
| KC344525       | 75D143       | ID      | Peru      | Iquitos                              | 1975            | Mosquito                | cec1 v2             |
| KC344526       | IQT1098      | ID      | Peru      | Iquitos                              | 1994            | Human                   | v1                  |
| KC344486       | 70U1134      | ID      | Peru      | Iquitos                              | 1970            | Hamster                 | sm1 cec1            |
| KC344487       | 334250       | ID      | Colombia  | Puerto Boyaca                        | 1977            | <i>Aedes fulvus</i>     | v2                  |
| KC344488       | 242959       | ID      | Panama    | Gamboa                               | 1966            |                         |                     |
| KC344506       | 4840         | ID      | Panama    |                                      | 1961            | Human                   | BHK1 Sm2 v1 cec1    |
| KC344523       | 97CO-42      | ID      | Colombia  |                                      | 1997            |                         | v1                  |
| KC344490       | IQT1724      | ID      | Peru      | Iquitos                              | 1995            | human                   | v1                  |
| KC344502       | 306425       | ID      | Colombia  | Puerto Boyaca                        | 1972            | Hamster                 | v2                  |
| KC344503       | 903104       | ID      | Panama    | Bayana                               | 1977            | <i>Cx. aikenii</i> s.l. | BHK1                |
| KC344504       | 02-2720-98   | ID      | Peru      | Iquitos                              | 1998            | Human                   | c6/36-1             |
| KC344507       | IQT3971      | ID      | Peru      | Iquitos                              | Unknown         | Human                   | c6/36-1             |
| KC344508       | 23647        | ID      | Venezuela | Catatumba, Zulia St.                 | 1974            | Hamster                 | v2                  |
| KC344509       | 251641       | ID      | Venezuela | Pto Concha                           | 1976            | Hamster                 | v3                  |
| KC344510       | 481460       | ID      | Panama    | Felipillo                            | 2000            | Human                   | v2                  |
| KC344511       | 484551       | ID      | Panama    | Darien, R Iglesias                   | 2001            | Human                   | v2                  |
| KC344512       | 204381       | ID      | Venezuela | Delta Amacuso                        | unknown         | Unknown                 |                     |
| KC344513       | ZPC727       | ID      | Venezuela | Las Nubes, Catatumba                 | 1997            | Hamster                 | none                |
| KC344514       | 335733       | ID      | Colombia  | Pto Boyaca                           | Aug-78          | Hamster                 | none                |
| KC344517       | R16905       | ID      |           |                                      |                 |                         |                     |
| KC344518       | 240832       | ID      | Panama    | Gamboa                               | 1965            | unknown                 | CEC1 v1             |
| KC344519       | 307537       | ID      | Colombia  | Puerto Boyaca                        | May-71          | <i>Mansonia</i> sp.     | vertebrate/mosquito |
| KC344520       | 309506       | ID      | Colombia  | Puerto Boyaca                        | Dec-73          | Hamster                 | vertebrate/mosquito |
| KC344521       | 993MM304-1   | ID      | Colombia  | Monte San Miguel                     | 1999            | Mosquito                | none                |
| KC344522       | FSE507       | ID      | Peru      | iquitos                              | 2000            | Human                   | v1                  |
| KC344524       | CoAn59145    | ID      | Colombia  | Tibu                                 |                 | Hamster                 | BHK3                |
| KC344471       | 8138         | ID      | Panama    | El Rincon                            | 1962            | Human                   | CEC-2               |
| KC344472       | GML903843    | ID      | Panama    | Bayano                               | 1984            | Human                   | V-1/BHK-1           |
| KC344475       | 212857       | ID      | Panama    | Darien, Santa Fe                     | 2003            | Human                   | SMB-1               |
| KC344476       | 213391       | ID      | Panama    | Bocas del Toro,                      | 2003            | Human                   | SMB-1               |
| KC344473       | 474590       | ID      | Panama    | Mananitas,                           | 1997            | Human                   | V-2                 |
| KC344474       | 485029       | ID      | Panama    | Darien, Yaviza,                      | 2001            | Human                   | V-2                 |
| KC344459       | 00SMH264     | ID      | Colombia  | Monte San Miguel                     | 2000            | Mosquito                | none                |
| KC344461       | 00SMH279     | ID      | Colombia  | Monte San Miguel                     | 2000            | Mosquito                | none                |
| pending*       | 622-20       | ID      | Venezuela | Monte San Miguel                     | 2000            |                         |                     |
| pending*       | AU-30        | ID      | Colombia  | Necocli                              | 11-Sep-13       | Human                   | V1                  |
| pending*       | MAC-10       | ID      | Venezuela | Padron Agric. Station, Miranda St    | 20-Jun-05       | Hamster                 | V1                  |
| pending*       | MHC-88       | ID      | Venezuela |                                      | 1998            |                         |                     |
| KC344527       | 77U204       | IE      | Guatemala | La Avellana, Santa Rosa Department   | 1977            |                         | BHK1                |
| KC344468       | MX10-H91     | IE      | Mexico    | Minatitlan                           | August 27,2010  | Hamster                 | original Tissue     |
| KC344492       | MX10-H95     | IE      | Mexico    | Minatitlan                           | August 28,2010  | Hamster                 | original Tissue     |
| KC344515       | MX01-32      | IE      | Mexico    | Chiapus State                        | 2001            | Hamster                 | none                |
| KC344431       | 63Z1         | IE      | Mexico    | Veracruz                             | 8/1963          | Human                   | sm1, V1             |
| KC344480       | MX09-M64     | IE      | Mexico    | Tacoteno, Minititlan, Veracruz State | 7/2/09          | <i>Cx. taeniopus</i>    | v1                  |
| KC344466       | 71U382       | IE      | Guatemala | La Avellana, Santa Rosa Department   | 1971            | Hamster                 | ?v1                 |
| KC344467       | 72U23        | IE      | Guatemala | La Avellana, Santa Rosa Department   | 1972            | Hamster                 | ?v1                 |
| KC344437       | 77U208       | IE      | Guatemala | La Avellana, Santa Rosa Department   | 1977            | Hamster                 |                     |
| KC344440       | 66U11        | IE      | Mexico    | Minatitlan, Veracruz State           | 1966            | Hamster                 | cec1                |
| KC344444       | 67U225       | IE      | Honduras  | Pto. Cortez                          | 1967            | Hamster                 | sm1                 |
| KC344446       | 65U206       | IE      | Mexico    | Sontecomapan, Veracruz State         | 1965            | Hamster                 | sm1                 |
| KC344448       | 69U315       | IE      | Mexico    | Sontecomapan, Veracruz State         | 1969            | Hamster                 | sm1                 |
| KC344455       | 79U13        | IE      | Guatemala | Izabal Department                    | 1979            | Hamster                 | ?                   |
| KC344457       | 63A216       | IE      | Mexico    | Veracruz                             | 8/13-14/1963    | Mosquito                | sm1                 |
| KC344458       | 70U80        | IE      | Guatemala | Izabal Department                    | 1970            | Hamster                 | sm1                 |
| KC344443       | 70U74        | IE      | Guatemala | Puerto Barrios, Izabal Department    | 8/1970          | Hamster                 |                     |
| KC344432       | BT-2607      | IE      | Panama    | Almirante                            | 1961            | <i>Cx. taeniopus</i>    | ?                   |
| KC344433       | 70U201       | IE      | Belize    |                                      | 1967            | Hamster                 | sm1                 |
| KC344434       | 73U151       | IE      | Guatemala | La Avellana, Santa Rosa Department   | 1973            | Hamster                 |                     |
| KC344435       | 68U200       | IE      | Guatemala | La Avellana, Santa Rosa Department   | 1968            | Hamster                 | none                |
| KC344436       | 70U55        | IE      | Guatemala | La Avellana, Santa Rosa Department   | 8/1970          | Hamster                 | sm1                 |
| KC344438       | 78U202       | IE      | Guatemala | La Avellana, Santa Rosa Department   | 1978            | Hamster                 |                     |
| KC344439       | 67U222       | IE      | Mexico    | Minatitlan, Veracruz State           | 1967            | Hamster                 | ?V1                 |
| KC344441       | 2177B        | IE      | Nicaragua |                                      | 1968            | unknown                 | V3                  |
| KC344442       | 68U217       | IE      | Guatemala | Puerto Barrios, Izabal Department    | 1968            | Hamster                 | ?,BHK1              |
| KC344445       | 64U87        | IE      | Mexico    | Sontecomapan, Veracruz State         | 7/26-28/1964    | <i>Cx. opisthopus</i>   | sm1                 |
| KC344447       | 66U91        | IE      | Mexico    | Sontecomapan, Veracruz State         | 4/1966          | Hamster                 | cec1                |
| KC344454       | 71U384       | IE      | Guatemala | Santa Rosa Department                | 1971            | Hamster                 | sm1, V1             |

|           |                 |      |               |                                         |            |                 |         |
|-----------|-----------------|------|---------------|-----------------------------------------|------------|-----------------|---------|
| KC344456  | 67U208          | IE   | Honduras      |                                         | 1967       | Hamster         | V?      |
| KC344449  | MX08-H50        | IE   | Mexico        | E. Coachapa, Minatitlan, Veracruz State | 7/8/08     | Hamster         | V1      |
| KC344451  | MX08-H53        | IE   | Mexico        | Tacoteno, Minatitlan, Veracruz State    | 7/13/08    | Hamster         | V1      |
| KC344464  | MX03-H2         | IE   | Mexico        | Las Coaches, Pijijiapan, Chiapas State  | 3-Aug-03   | Hamster         | V1      |
| KC344482  | MX03-H1         | IE   | Mexico        | Chiapus State                           | 2003       | Hamster         | V1      |
| KC344465  | MX10-H4         | IE   | Mexico        | El Dorado, Mapastepec, Chiapas State    | 25-Jul-10  | Hamster         | V1      |
| KC344450  | MX08-H51        | IE   | Mexico        | E. Coachapa, Minatitlan, Veracruz State | 7/9/08     | Hamster         | V1      |
| KC344492  | MX10-H94        | IE   | Mexico        | Minatitlan, Veracruz State              | Aug-10     | Hamster         | V1      |
| KC344478  | MX09-M51        | IE   | Mexico        | Tacoteno, Minititlan, Veracruz State    | 9/20/09    | Cx. nigripalpus | V1      |
| KC344479  | MX09-M50        | IE   | Mexico        | Tacoteno, Minititlan, Veracruz State    | 9/20/09    | M. titillans    | V1      |
| KC344481  | MX09-Eq03       | IE   | Mexico        | Tacoteno, Minititlan, Veracruz State    | 10/27/09   | Horse           | V1      |
| KC344463  | MX09-Eq05       | IE   | Mexico        | Tacoteno, Minititlan, Veracruz State    | 28-Oct-09  | Horse           | V1      |
| pending*  | MX01-15         | IE   | Mexico        |                                         | 2001       | Hamster         |         |
| KR260737* | EVG3-95         | II   | United States | Everglades National Park, Florida       | 2-Jul-13   | Mosquito        |         |
| AF069903  | 71_180          | IAB  | United States | Texas                                   | 1971       | horse           |         |
| L01442    | Trinidad Donkey | IAB  | Trinidad      | N/A                                     | 1943       | N/A             | N/A     |
| NC_001449 | P676            | IC   | Venezuela     | Miranda State                           | 1963       | horse           |         |
| AF004459  | 243937          | IC   | Venezuela     | Trujillo State                          | 9/1/93     | human           | V1      |
| AY973944  | 254934          | IC   | Venezuela     | Barinas                                 | 10/4/00    | horse           |         |
| AY986475  | 255010          | IC   | Venezuela     | Barinas                                 | 02/20/2000 | horse           |         |
| U55342    | V198            | IC   | Colombia      | La Guajira Dept.                        | 1962       | human           |         |
| U55345    | PMCH05          | IC   | Venezuela     | Monagas State                           | 1964       | human           |         |
| U55347    | 6119            | IC   | Venezuela     | Falcon State                            | 05/24/1995 | human           |         |
| U55350    | 3908            | IC   | Venezuela     | Sinamaica, Zulia State                  | 09/16/1995 | human           |         |
| U55360    | SH3             | IC   | Venezuela     |                                         | 9/1/93     | human           |         |
| AF004458  | 66637           | ID   | Venezuela     | Sinamaica, Zulia State                  | 11/19/1981 | hamster         |         |
| AF004458  | 66457           | ID   | Venezuela     | Sinamaica, Zulia State                  | 11/11/81   | hamster         |         |
| AF100566  | ZPC738          | ID   | Venezuela     | Zulia State                             | 9/24/1997  | hamster         |         |
| AY966912  | IQT8131         | ID   | Peru          |                                         | 1998       | human           |         |
| L00930    | 3880            | ID   | Panama        | Canito                                  | 1961       | human           |         |
| U55362    | 83U434          | ID   | Colombia      | N. Santander                            | Jun-1983   | hamster         | SM1, V1 |
| AF075252  | Menall          | IE   | Panama        |                                         | 1962       |                 |         |
| AF448535  | CPA152          | IE   | Mexico        | Chipas                                  | 1996       | horse           |         |
| AF448536  | OAX131          | IE   | Mexico        | Oaxaca                                  | 1996       | horse           |         |
| AF448537  | CPA201          | IE   | Mexico        | Chiapas                                 | 1993       | horse           |         |
| AF448538  | OAX142          | IE   | Mexico        | Oaxaca                                  | 1996       | horse           |         |
| AF448539  | 80U76           | IE   | Guatemala     | La Avellana, Santa Rosa Dept.           | 1980       | Hamster         |         |
| AY823299  | MX01-22         | IE   | Mexico        |                                         | 2001       | N/A             |         |
| AF075257  | 78V3531         | IF   | Brazil        |                                         | 1978       | N/A             |         |
| AF075251  | EVEV            | II   | United States | Florida                                 | 1963       |                 |         |
| AF075254  | MUCV            | IIIA | Brazil        |                                         | 1954       | N/A             |         |
| AF075253  | TONV            | IIIB | French Guiana |                                         | 1973       | Mosquito        |         |
| AF075255  | 71D-1252        | IIIC | Peru          |                                         | 1971       | Hamster         |         |
| AF075256  | PIXV            | IV   | Brazil        |                                         | 1961       |                 |         |
| AF075259  | CABV            | V    | French Guiana |                                         | 1968       |                 |         |
| AF075258  | AG80-663        | VI   | Argentina     |                                         | 1980       |                 |         |
| EF151502  | FL93-939        | I    | USA           | Florida                                 | 1993       |                 |         |
| DQ241303  | PE_3.0815       | II   | Peru          |                                         | 1996       | Mosquito        |         |
| DQ241304  | PE_0.9155       | III  | Peru          |                                         | 1996       | Mosquito        |         |
| EF151503  | BeAr436087      | IV   | Brazil        |                                         |            |                 |         |
