# Supplementary material for: Evolution and spread of Venezuelan equine encephalitis complex alphavirus in the Americas
Source: PubMed Central journal article supplement (PMC5557581; doi:10.1371/journal.pntd.0005693), 2017-08-03
Supplement: pntd.0005693.s002.pdf [file pntd.0005693.s002.pdf]

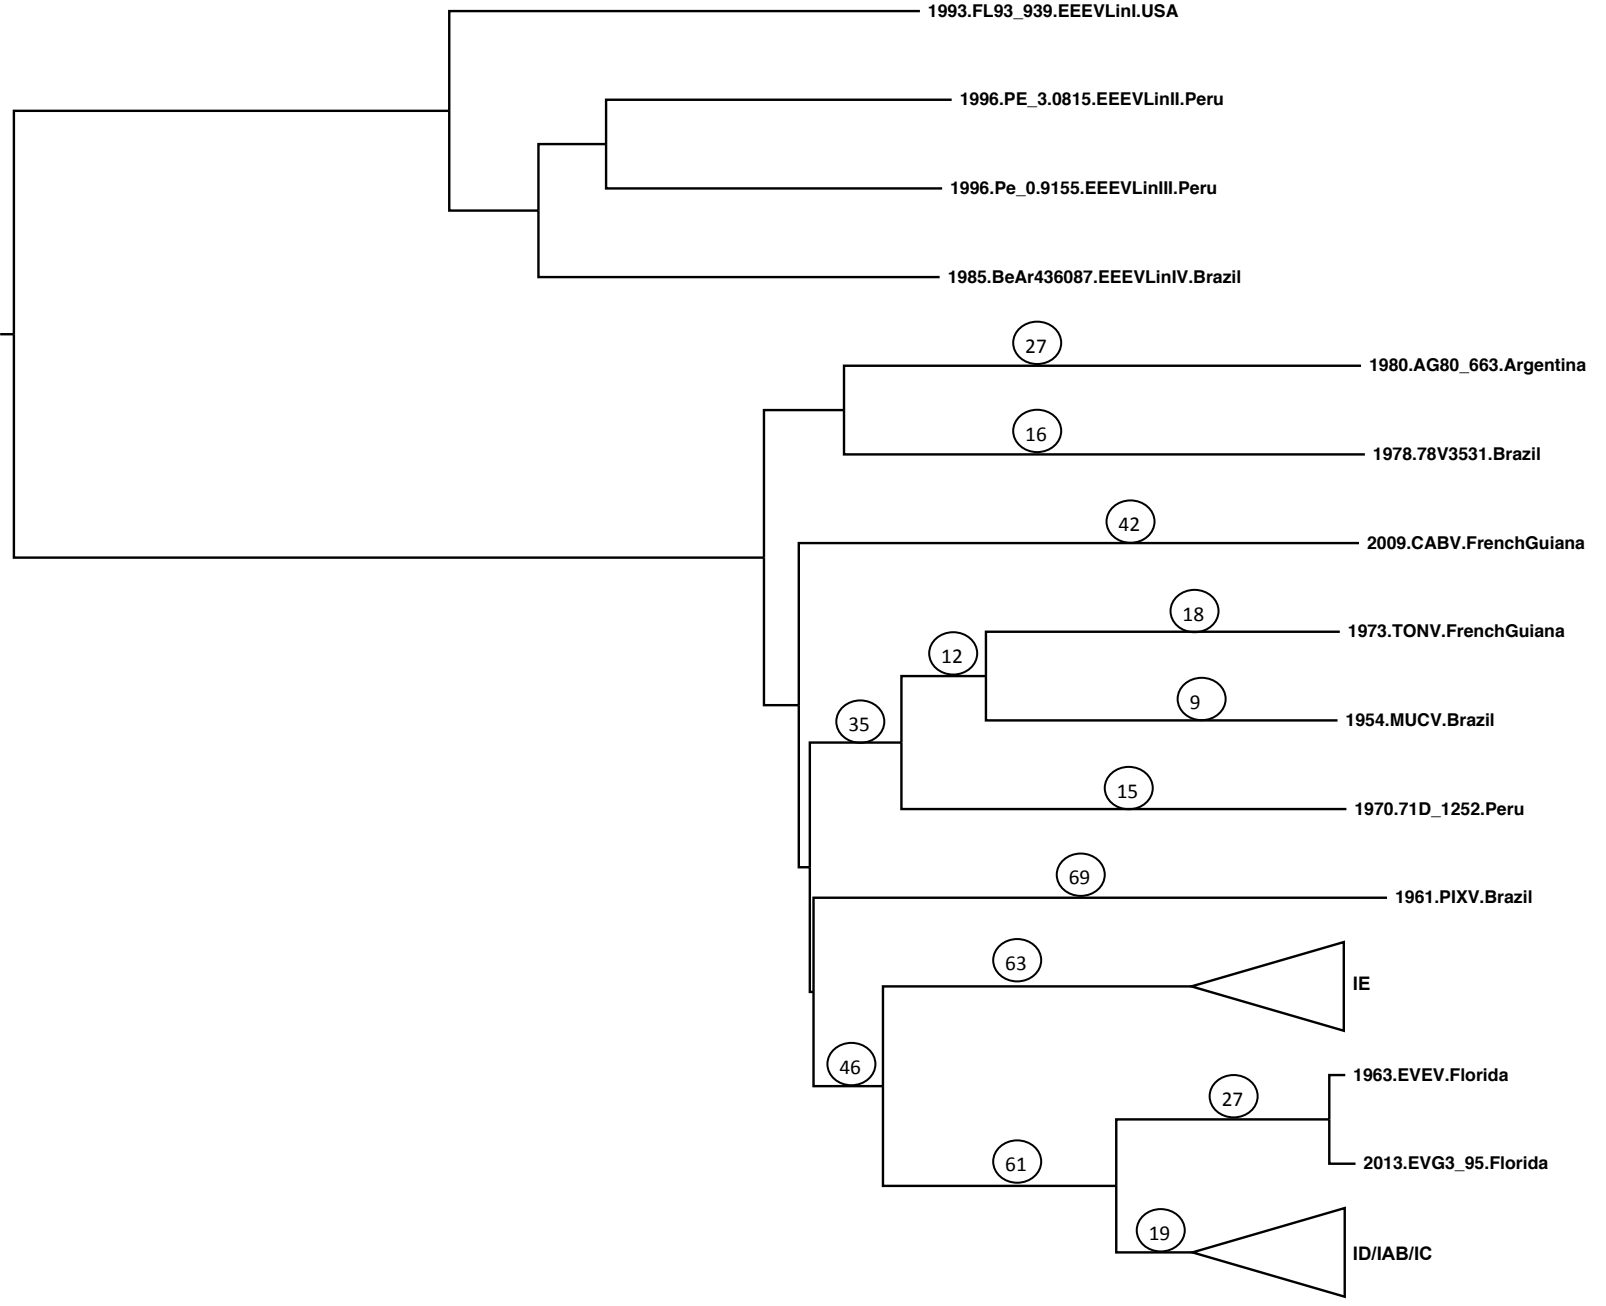

0.06
