# Supplementary material for: Evolution and spread of Venezuelan equine encephalitis complex alphavirus in the Americas
Source: PubMed Central journal article supplement (PMC5557581; doi:10.1371/journal.pntd.0005693), 2017-08-03
Supplement: pntd.0005693.s003.pdf [file pntd.0005693.s003.pdf]

**Supplemental Figure 2. List of all amino acid changes associated with major subtypes.**

| <b>AG80</b> |            | <b>78V</b> |            | <b>AG80/78V</b> |            | <b>CABV</b> |            |
|-------------|------------|------------|------------|-----------------|------------|-------------|------------|
| Position    | Amino Acid | Position   | Amino Acid | Position        | Amino Acid | Position    | Amino Acid |
| 98          | Ser        | 98         | Ser        | 200             | Ser        | 76          | Asn        |
| 111         | Asn        | 102        | Arg        | 203             | Val        | 111         | Gly        |
| 124         | Thr        | 111        | Asn        | 228             | Met        | 114         | Gln        |
| 128         | Ileu       | 132        | Ser        | 239             | Ileu       | 116         | Leu        |
| 232         | Phe        | 176        | Val        | 428             | Val        | 124         | Gln        |
| 237         | ser        | 238        | Ser        | 434             | Lys        | 125         | Glu        |
| 459         | Ala        | 305        | Ser        | 458             | Thr        | 127         | Ser        |
| 491         | Thr        | 1876       | Gly        | 472             | Met        | 144         | Asp        |
| 495         | Val        | 1955       | Ser        | 498             | Arg        | 147         | Ileu       |
| 1000        | Gln        | 2376       | Val        | 569             | Lys        | 239         | Ileu       |
| 1192        | Ser        | 2471       | His        | 584             | Pro        | 269         | Thr        |
| 1219        | Gln        | 2696       | thr        | 779             | Tyr        | 299         | Thr        |
| 1431        | Gln        | 3163       | Met        | 786             | Val        | 403         | Asp        |
| 1877        | Leu        | 3307       | Leu        | 1651            | Asp        | 440         | Val        |
| 1878        | Ala        | 3435       | MET        | 1767            | Ileu       | 514         | Thr        |
| 1932        | Arg        | 3796       | Ileu       | 1859            | Ser        | 610         | Thr        |
| 2376        | Ser        |            |            | 2290            | Ala        | 661         | Gly        |
| 2591        | Ileu       |            |            | 2590            | Val        | 738         | Lys        |
| 2697        | Ala        |            |            | 2720            | Gln        | 750         | Ileu       |
| 2706        | Lys        |            |            | 3129            | Val        | 779         | Tyr        |
| 2795        | Thr        |            |            | 3174            | Gly        | 873         | Gln        |
| 2935        | Thr        |            |            | 3351            | Cys        | 976         | Glu        |
| 3232        | Lys        |            |            | 3564            | THr        | 1000        | Asn        |
| 3245        | Leu        |            |            | 117             | Glu        | 1179        | Thr        |
| 3412        | Val        |            |            |                 |            | 1701        | Ser        |
| 3514        | Ileu       |            |            |                 |            | 1771        | Asp        |
| 3793        | Val        |            |            |                 |            | 1813        | Ala        |
|             |            |            |            |                 |            | 1913        | Ala        |
|             |            |            |            |                 |            | 1942        | Ser        |
|             |            |            |            |                 |            | 1950        | Ileu       |
|             |            |            |            |                 |            | 2048        | Asp        |
|             |            |            |            |                 |            | 2290        | Cys        |
|             |            |            |            |                 |            | 2577        | Ser        |
|             |            |            |            |                 |            | 2590        | Ileu       |
|             |            |            |            |                 |            | 2609        | Thr        |
|             |            |            |            |                 |            | 2706        | Ileu       |
|             |            |            |            |                 |            | 2709        | Ala        |
|             |            |            |            |                 |            | 3259        | Asn        |
|             |            |            |            |                 |            | 3355        | Leu        |
|             |            |            |            |                 |            | 3424        | Ileu       |
|             |            |            |            |                 |            | 3435        | Phe        |
|             |            |            |            |                 |            | 3793        | Thr        |

| 71D      |            |
|----------|------------|
| Position | Amino Acid |
| 227      | Val        |
| 409      | Glu        |
| 465      | Lys        |
| 466      | Ser        |
| 750      | Leu        |
| 1871     | Ileu       |
| 1942     | THR        |
| 1950     | Cys        |
| 1990     | Arg        |
| 2141     | Thr        |
| 3039     | Val        |
| 3146     | Ala        |
| 3218     | Lys        |
| 3477     | Ser        |
| 3713     | Ileu       |

| MUCV     |            |
|----------|------------|
| Position | Amino Acid |
| 81       | Val        |
| 85       | Arg        |
| 94       | Tyr        |
| 239      | Ileu       |
| 661      | Thr        |
| 1942     | Pro        |
| 1989     | Arg        |
| 2048     | Asn        |
| 2709     | Val        |

| TONV     |            |
|----------|------------|
| Position | Amino Acid |
| 75       | Asn        |
| 98       | Ser        |
| 495      | Thr        |
| 513      | Met        |
| 661      | Asn        |
| 663      | His        |
| 705      | Arg        |
| 750      | Thr        |
| 761      | Asp        |
| 1118     | Phe        |
| 1771     | Gln        |
| 1913     | Ser        |
| 2048     | His        |
| 2618     | Leu        |
| 2709     | Asp        |
| 3326     | Ileu       |
| 3477     | Val        |
| 3514     | Ala        |

| TONV/MUCV |            |
|-----------|------------|
| Position  | Amino Acid |
| 162       | Ileu       |
| 353       | Glu        |
| 508       | Ileu       |
| 643       | Ileu       |
| 978       | Thr        |
| 1867      | Leu        |
| 1990      | Lys        |
| 2577      | His        |
| 2935      | Ala        |
| 3044      | Val        |
| 3383      | Phe        |
| 3793      | Leu        |

| TONV/MUCV/71D |            |
|---------------|------------|
| Position      | Amino Acid |
| 124           | Glu        |
| 440           | Val        |
| 514           | Val        |
| 582           | Glu        |
| 758           | Lys        |
| 764           | Ileu       |
| 804           | Ileu       |
| 976           | Glu        |
| 1179          | Thr        |
| 1195          | Lys        |
| 1384          | Ser        |
| 1524          | Phe        |
| 1810          | Val        |
| 1813          | Gln        |
| 1814          | Gly        |
| 1861          | Asp        |
| 1862          | Ileu       |
| 1866          | Ala        |
| 2163          | Met        |
| 2290          | Ser        |
| 2591          | Thr        |
| 2618          | Val        |
| 2707          | Ala        |
| 3131          | Asp        |
| 3174          | Ser        |
| 3175          | Ala        |
| 3346          | Val        |
| 3486          | Arg        |
| 3518          | Pro        |
| 3564          | ser        |
| 3627          | Val        |
| 3653          | Leu        |
| 3752          | Ser        |
| 3796          | Val        |
| 3804          | Leu        |

| TONV/MUCV/71D |            |
|---------------|------------|
| Position      | Amino Acid |
| 3161          | Thr        |
| 3163          | Lys        |
| 3164          | Thr        |
| 3174          | Ala        |
| 3200          | Met        |
| 3268          | Gly        |
| 3324          | Met        |
| 3351          | Ala        |
| 3355          | Ala        |
| 3521          | Arg        |
| 3594          | Val        |
| 3595          | Ala        |
| 3646          | Arg        |
| 3729          | Thr        |

| PIXV     |            |
|----------|------------|
| Position | Amino Acid |
| 98       | Ser        |
| 104      | Ser        |
| 106      | Ala        |
| 117      | Thr        |
| 144      | Ser        |
| 146      | His        |
| 147      | Ileu       |
| 167      | Glu        |
| 203      | Ser        |
| 236      | Thr        |
| 237      | Asp        |
| 239      | Ileu       |
| 253      | Glu        |
| 271      | Ser        |
| 386      | Ileu       |
| 408      | Met        |
| 471      | Met        |
| 491      | Arg        |
| 501      | Thr        |
| 505      | Ala        |
| 508      | Glu        |
| 644      | Asn        |
| 661      | Glu        |
| 673      | Arg        |
| 683      | His        |
| 761      | Asn        |
| 786      | Val        |
| 830      | Tyr        |
| 873      | Pro        |
| 974      | Ala        |
| 1000     | Ala        |
| 1022     | Arg        |
| 1206     | Ileu       |
| 1794     | Asp        |
| 1810     | Ser        |

| PIXV     |            |
|----------|------------|
| Position | Amino Acid |
| 1813     | Ser        |
| 1815     | Val        |
| 1850     | Ileu       |
| 1857     | Val        |
| 1859     | Gly        |
| 1860     | Pro        |
| 1862     | Val        |
| 1867     | Ileu       |
| 1871     | Gln        |
| 1877     | Ileu       |
| 1879     | Val        |
| 1921     | Leu        |
| 1922     | Pro        |
| 1980     | Leu        |
| 2191     | Thr        |
| 2290     | Thr        |
| 2376     | Leu        |
| 2616     | Asp        |
| 2697     | Gln        |
| 2699     | Arg        |
| 3161     | Thr        |
| 3163     | Lys        |
| 3164     | Thr        |
| 3174     | Ala        |
| 3200     | Met        |
| 3268     | Gly        |
| 3324     | Met        |
| 3351     | Ala        |
| 3355     | Ala        |
| 3521     | Arg        |
| 3594     | Val        |
| 3595     | Ala        |
| 3646     | Arg        |
| 3729     | Thr        |

| VEEV ID  |            |
|----------|------------|
| Position | Amino Acid |
| 133      | Met        |
| 424      | Arg        |
| 1683     | Gly        |
| 1698     | THR        |
| 1704     | Ileu       |
| 1739     | Leu        |
| 1772     | Ileu       |
| 1781     | Ser        |
| 1781     | Gln        |
| 1867     | Val        |
| 1876     | Thr        |
| 1922     | Thr        |
| 1934     | Leu        |
| 2056     | Gln        |
| 2704     | Lys        |
| 2706     | Gly        |
| 2729     | Ala        |
| 2945     | Val        |
| 3655     | Ser        |

| EVEV     |            |
|----------|------------|
| Position | Amino Acid |
| 133      | Val        |
| 256      | Lys        |
| 337      | Ileu       |
| 417      | Leu        |
| 466      | Asn        |
| 500      | Ala        |
| 656      | Arg        |
| 750      | Thr        |
| 887      | Gly        |
| 974      | Ser        |
| 986      | Thr        |
| 1735     | Gly        |
| 1739     | Ser        |
| 1763     | Arg        |
| 1861     | Thr        |
| 1922     | Ileu       |
| 1936     | Leu        |
| 2694     | Ser        |
| 2709     | Arg        |
| 2715     | Glu        |
| 3154     | Leu        |
| 3260     | Tyr        |
| 3338     | Thr        |
| 3412     | Thr        |
| 3531     | Ala        |
| 3655     | Leu        |
| 3793     | Ser        |

| VEEV IE  |            |
|----------|------------|
| Position | Amino Acid |
| 94       | Phe        |
| 121      | Glu        |
| 140      | Thr        |
| 143      | Phe        |
| 232      | Phe        |
| 424      | Arg        |
| 475      | Pro        |
| 514      | Ser        |
| 574      | Thr        |
| 610      | Gln        |
| 656      | Arg        |
| 664      | Glu        |
| 871      | Asp        |
| 872      | Ser        |
| 954      | Lys        |
| 976      | Asp        |
| 1150     | Ala        |
| 1179     | Ser        |
| 1191     | Asp        |
| 1219     | Gln        |
| 1299     | Phe        |
| 1547     | Met        |
| 1660     | Ala        |
| 1668     | Ala        |
| 1670     | Asn        |
| 1778     | Ala        |
| 1794     | Arg        |
| 1815     | Ser        |
| 1857     | Asp        |
| 1859     | Ileu       |
| 1860     | Ser        |
| 1935     | Leu        |
| 2257     | Lys        |
| 2290     | Asp        |
| 2301     | Ileu       |
| 2437     | Arg        |
| 2458     | Met        |
| 2608     | Glu        |
| 2619     | Ser        |
| 2704     | Gly        |
| 2714     | Lys        |
| 2715     | Leu        |
| 2716     | Val        |
| 2731     | Gly        |
| 2903     | Ser        |
| 2966     | Gly        |
| 3053     | Val        |
| 3163     | Gln        |
| 3200     | Thr        |
| 3229     | Val        |
| 3263     | Phe        |
| 3274     | Ala        |
| 3309     | Ser        |
| 3355     | Val        |
| 3363     | Ileu       |
| 3424     | Ala        |

| VEEV IE  |            |
|----------|------------|
| Position | Amino Acid |
| 3481     | Val        |
| 3531     | Ser        |
| 3564     | Val        |
| 3625     | Lys        |
| 3690     | Tyr        |
| 3869     | Ileu       |

| VEEV ID/II |            |
|------------|------------|
| Position   | Amino Acid |
| 85         | Arg        |
| 98         | Thr        |
| 425        | Arg        |
| 431        | Ileu       |
| 475        | Lys        |
| 492        | Cys        |
| 569        | Lys        |
| 683        | Thr        |
| 870        | Lys        |
| 886        | Thr        |
| 1040       | Glu        |
| 1147       | Leu        |
| 1150       | Asn        |
| 1154       | Gln        |
| 1206       | Val        |
| 1285       | Ser        |
| 1431       | Lys        |
| 1444       | Ser        |
| 1451       | THr        |
| 1479       | Met        |
| 1484       | Ala        |
| 1641       | Gln        |
| 1651       | Ala        |
| 1686       | Glu        |
| 1696       | Gln        |
| 1778       | Pro        |
| 1812       | Ileu       |
| 1866       | Ser        |
| 1889       | ser        |
| 1955       | Val        |
| 1957       | Thr        |
| 2091       | Ala        |
| 2290       | Asn        |
| 2380       | Arg        |
| 2412       | Ala        |
| 2471       | Gly        |
| 2577       | Leu        |
| 2608       | Lys        |
| 2670       | Thr        |
| 2698       | Ala        |
| 2701       | Lys        |
| 2702       | Gln        |
| 2708       | Gln        |
| 2713       | Lys        |
| 2714       | Asn        |
| 2720       | Ala        |
| 2726       | Asn        |
| 2959       | Ala        |
| 2960       | Val        |
| 3119       | Ala        |
| 3121       | Gln        |
| 3192       | Lys        |
| 3218       | Ala        |
| 3231       | Ala        |
| 3233       | Gly        |
| 3271       | Asp        |

| VEEV ID/II |            |
|------------|------------|
| Position   | Amino Acid |
| 3274       | His        |
| 3349       | Val        |
| 3564       | Leu        |
| 3593       | Val        |
| 3698       | Ala        |

| VEEV ID/IE/II |            |
|---------------|------------|
| Position      | Amino Acid |
| 225           | Met        |
| 240           | Leu        |
| 270           | Gln        |
| 441           | Val        |
| 444           | Asn        |
| 455           | Ileu       |
| 461           | Glu        |
| 474           | Glu        |
| 551           | Ala        |
| 554           | Asp        |
| 615           | Gln        |
| 643           | Thr        |
| 663           | His        |
| 693           | Asp        |
| 738           | Lys        |
| 758           | Lys        |
| 760           | Lys        |
| 804           | Ileu       |
| 805           | Arg        |
| 940           | Thr        |
| 978           | Thr        |
| 993           | Arg        |
| 1118          | Tyr        |
| 1174          | Glu        |
| 1527          | Ser        |
| 1564          | Val        |
| 1657          | Lys        |
| 1737          | Ileu       |
| 1779          | Ser        |
| 1810          | Leu        |
| 1862          | Leu        |
| 2096          | Gln        |
| 2356          | Ileu       |
| 2634          | Pro        |
| 3042          | Thr        |
| 3101          | Asn        |
| 3377          | Met        |
| 3441          | Val        |
| 3477          | Pro        |
| 3491          | Val        |
| 3504          | Met        |
| 3520          | Thr        |
| 3661          | Ser        |
| 3678          | Ala        |
| 3713          | Thr        |
| 3804          | Ileu       |
